# 1 Small interfering RNAs are highly effective inhibitors regarding Crimean-Congo 2 hemorrhagic fever virus replication *in vitro*

3  
4 Fanni Földes<sup>1,2</sup>, Mónika Madai<sup>1,2</sup>, Henrietta Papp<sup>1,2</sup>, Gábor Kemenesi<sup>1,2</sup>, Brigitta Zana<sup>1,2</sup>, Lili Geiger<sup>3</sup>,  
5 Katalin Gombos<sup>3</sup>, Balázs Somogyi<sup>1</sup>, Ildikó Bock-Marquette<sup>4</sup> and Ferenc Jakab<sup>1, 2\*</sup>

6 <sup>1</sup> Virological Research Group, BSL-4 Laboratory, Szentágotthai Research Centre, University of Pécs, Pécs  
7 Hungary, 7624 Pécs, Hungary; fanni4444@gmail.com (F.F.); mmoni84@gmail.com (M.M.);  
8 phencsi@gmail.com (H.P.); kemenesi.gabor@gmail.com (G.K.); brigitta.zana@gmail.com (B.Z.);  
9 sobalbundi@gmail.com (B.S.); jakab.ferenc@pte.hu (F.J.)

10 <sup>2</sup> Institute of Biology, Faculty of Sciences, University of Pécs, 7622 Pécs, Hungary; fanni4444@gmail.com  
11 (F.F.); mmoni84@gmail.com (M.M.); phencsi@gmail.com (H.P.); kemenesi.gabor@gmail.com (G.K.);  
12 brigitta.zana@gmail.com (B.Z.); jakab.ferenc@pte.hu (F.J.)

13 <sup>3</sup> Department of Laboratory Medicine, Medical School, University of Pécs, 7624 Pécs, Hungary;  
14 g.lilly92@gmail.com (L.G.); gombos.katalin@pte.hu (K.G.)

15 <sup>4</sup> Regenerative Science, Sport and Medicina Research Group, Szentágotthai Research Centre, University of  
16 Pécs, Pécs Hungary, 7624 Pécs, Hungary; ibockm@gmail.com (I.B.M.)

17 \* Correspondence: jakab.ferenc@pte.hu (F.J.); Tel.: +36-72-501-668/29044 (F.J.)

18 **Abstract:** Crimean-Congo hemorrhagic fever virus (CCHFV) is one of the prioritized diseases of  
19 World Health Organization, considering its potential to create a public health emergency and more  
20 importantly, the absence of efficacious drugs and/or vaccines regarding treatment. The highly lethal  
21 nature characteristic to CCHFV restricts research to BSL-4 laboratories, which complicates effective  
22 research and developmental strategies. In consideration of antiviral therapies, RNA interference can  
23 be used to suppress viral replication by targeting viral genes. RNA interference uses small  
24 interfering RNAs (siRNAs) to silence genes. The aim of our study was to design siRNAs that inhibit  
25 CCHFV replication and can serve as a basis for further antiviral therapies. A549 cells were infected  
26 with CCHFV after transfection with the siRNAs. Following 72 hours, nucleic acid from the  
27 supernatant was extracted for Droplet Digital PCR analysis. Among the investigated siRNAs we  
28 identified four effective candidates against all three segments of CCHF genome: one for the S and  
29 M segments, whilst two for the L segment. Consequently, blocking any segment of CCHFV leads to  
30 changes in the virus copy number that indicates an antiviral effect of the siRNAs *in vitro*. The most  
31 active siRNAs were demonstrated a specific inhibitory effect against CCHFV in a dose-dependent  
32 manner. In summary, we demonstrated the ability of specific siRNAs to inhibit CCHFV replication  
33 *in vitro*. This promising result can be used in future anti-CCHFV therapy developments.

34 **Keywords:** CCHFV; Nairovirus; siRNA; RNA interference; gene silencing  
35

---

## 36 1. Introduction

37 Crimean-Congo hemorrhagic fever virus (CCHFV) categorically belongs to the *Orthonairovirus*  
38 genus, the *Nairoviridae* family in the *Bunyavirales* order. CCHFV is causing a mild to severe  
39 hemorrhagic disease in humans, with fatality rates from 5% up to 30% [1].

40 CCHFV is characterized by a tripartite single-stranded RNA genome (S, M and L segment) of  
41 ambisense (S) and negative (M, L) polarity. The three genome segments encode four structural  
42 proteins: the RNA dependent RNA polymerase is encoded by the large (L) segment, the  
43 glycoproteins (G<sub>N</sub> and G<sub>C</sub>) are encoded by the medium (M) segment, and the nucleocapsid protein  
44 and nonstructural protein are encoded by the small (S) segment [2].

45 Emerging infectious diseases (EIDs) are growing threats to animal and human health. CCHFV  
46 is a tick-borne pathogen that causes an increasing number of severe infections and presents over a  
47 wide geographic range, including areas in South-Eastern Europe, Western and Central Asia, the  
48 Middle East and Africa as well [1]. This virus is transmitted primarily by ticks, but the spectrum of  
49 natural hosts for CCHFV includes a wide variety of domestic and wild animals [3].

50 There are neither vaccines nor effective antiviral therapies for the treatment of CCHFV infections  
51 in humans to date [4]. There is a growing need for advantaged research and development activities  
52 for such pathogens as CCHFV, since there is a constantly growing geographic and epidemiologic  
53 burden of the disease and BSL-4 capacity is limited throughout the world, which can safely handle  
54 such research.

55 Among antiviral therapies, RNA interference (RNAi) can be used to suppress viral replication  
56 by targeting either viral- or host genes that are needed for viral replication. Since its discovery in 1998  
57 [5], it has revolutionized the mechanism of gene silencing and improved our understanding of the  
58 endogenous mechanism of gene regulation to enhance the use of new tools for antiviral research.  
59 Silencing viral genes such as viral polymerases, master regulators of viral gene transcription and viral  
60 genes that act early in the viral life cycle, may suppress viral replication more effectively than  
61 targeting late or accessory viral genes. Moreover, RNAi could target viral proteins and pathways,  
62 which are unique to the viral life cycle and it has become possible to interfere with viral infections  
63 and replication without unacceptable host cell toxicity [6]. Accordingly, the major advantage of RNA  
64 interference is its target specificity. In recent years, many viruses have been successfully targeted by  
65 RNA interference such as human immunodeficiency virus (HIV) [7,8], Severe Acute Respiratory  
66 Syndrome coronavirus (SARS-CoV) [9], Hepatitis B virus (HBV) [10], Hepatitis C virus (HCV) [11],  
67 Influenza A virus [12], Hazara virus (HAZV) [13], Langkat virus (LGTV) [14], Andes virus (ANDV)  
68 [15] and West Nile virus (WNV) [16]. So far, to the best of our knowledge, this is the first study that  
69 used RNA interference to inhibit CCHFV replication *in vitro*. Although, another member of the  
70 *Nairoviridae* family (e.g. HAZV) was already researched on virus gene silencing by RNA interference  
71 [13].

72 RNA interference uses small double-stranded RNAs with a complementary sequence to the  
73 target silencing genes. Nevertheless, endogenous gene silencing operates through multiple  
74 mechanisms such as mRNA cleavage, inhibition of translation, and epigenetic modifications of  
75 chromatin, of which mRNA cleavage is the most efficient mechanism for antiviral therapies [6]. Small  
76 interfering RNAs (siRNA) are the active agents in RNA interference. The siRNAs are 21–22  
77 nucleotides long, serve as a guide for cognate mRNA degradation [17]. Naturally, these siRNAs are  
78 a result of endonucleolytic processing of a larger precursor RNA. Experimentally, RNAi can be  
79 triggered in mammalian cells after the transfection of synthetic siRNA using suitable transfection  
80 reagents. These siRNAs are incorporated into a cytoplasmic RNA-induced silencing complex (RISC)  
81 which cleaves exogenous double-strand siRNAs and leaving an unpaired guide strand to search for  
82 complementary mRNAs. If the target site on the mRNA has nearly perfect complementarity to the  
83 guide siRNA, the mRNA is cut by an Argonaute (Ago) endonuclease in the RISC and is degraded.  
84 This way, siRNA is silencing the expression of the protein encoded by the target mRNA. Typically,  
85 protein expression is reduced but not eliminated [6].

86 Recent works have shown that more effective antiviral therapies are urgently needed to treat  
87 virus infections especially for viruses with growing epidemic potential [9,15]. Furthermore, these  
88 RNA interference experiments have shown that the application of siRNAs can inhibit viral infection  
89 by targeting viral genes [18,19]. However, many aspects of the CCHFV cell entry, replication and  
90 pathogenesis remain poorly defined. It was mostly studied by using minigenome systems or virus-  
91 like-particle systems considering its highly infectious nature and the lack of BSL-4 laboratories [2]. In  
92 our present study, we aimed to design chemically synthesized siRNAs that can inhibit first time  
93 CCHFV replication *in vitro*. This study presents the first step forward to future RNAi-based CCHF  
94 antiviral therapy development.

## 95 **2. Materials and Methods**

### 96 *2.1. Cell line, virus amplification and titer determination*

97 A549 cells (human lung carcinoma cell line, ATCC CCL-185) were grown in Dulbecco's modified  
98 eagle medium (DMEM) (Lonza) supplemented with 10% heat-inactivated fetal bovine serum (FBS)

99 (EuroClone) and 1% Penicillin-Streptomycin (Lonza) maintained at 37°C in a humidified atmosphere  
 100 containing in a 5% CO<sub>2</sub>.

101 A549 cells with 60% confluence were infected by the CCHFV Kosova Hoti strain [20] in our  
 102 experiments. The virus was grown to high titers on A549 cells and the supernatants were aliquoted  
 103 and were frozen at -80°C in 1 ml vials and constituted the viral stock. All laboratory manipulations  
 104 associated with infectious CCHFV were performed in a BSL-4 suite laboratory, aligned to the  
 105 University of Pécs, Szentágotthai Research Centre.

106 CCHFV viral stock was titrated using the TCID<sub>50</sub> method with the immunofluorescence assay.  
 107 Briefly, serial 10-fold dilutions of CCHFV supernatant were inoculated (100 µl) on 60% confluent  
 108 A549 cells (30000 cells/well) in 48-well plates. Viral adsorption was allowed for 1 hour at 37°C. After  
 109 washing cells with PBS three times, cells were incubated for 3 days at 37°C in DMEM supplemented  
 110 with 2% FBS. The fixation and the immunofluorescence assay were performed as previously  
 111 described using with polyclonal mouse antibody which was produced against the recombinant  
 112 CCHFV capsid protein [21]. The percentage of infected cells was observed with immunofluorescence  
 113 microscopy and recorded for each virus dilution then results were used to mathematically calculate  
 114 a TCID<sub>50</sub> result with the Spearman-Kärber method. During our experiments, A549 cells were  
 115 infected with CCHFV at a MOI of 0.1 in our following infection and transfection assays.

## 116 2.2. Design and synthesis of siRNAs

117 The sequences of CCHFV Kosova Hoti strain S, M and L genomic segments (GenBank:  
 118 DQ133507, EU037902, EU044832) were used to design the siRNAs. Synthetic 21-nucleotide siRNAs  
 119 with short 3' overhangs (UU) were designed by the Whitehead siRNA Selection Program to have an  
 120 antisense strand complementary to the CCHFV [22]. The siRNA sequences were chosen according to  
 121 the algorithm score. For each viral mRNAs, five siRNAs were synthesized by Dharmacon™ (Table  
 122 1). Sequences were subjected to a BLAST search against GenBank to minimize off-target effects. All  
 123 lyophilized siRNAs were reconstituted according to the manufacturer's instruction, aliquoted in 10  
 124 µM stock solutions and were stored at -20°C until further use. The TOX siRNA (siTOX)  
 125 (Dharmacon™ RNAi technologies, Lafayette, USA) was used to determine transfection efficacy.

126  
 127

**Table 1.** List of designed siRNAs

| siRNA ID | Position  | Sequence                        |
|----------|-----------|---------------------------------|
| siS1     | 1651-1673 | S 5': GCGGCAACGAUAUCUUUGA UU    |
|          |           | mRNA: GT GCGGCAACGATATCTTTGA GA |
|          |           | AS 3': UU CGCCGUUGCUAUAGAAACU   |
| siS2     | 26-48     | S 5': CCACAGUGUUCUCUUGAGU UU    |
|          |           | mRNA: GC CCACAGTGTTCTCTTGAGT GT |
|          |           | AS 3': UU GGUGUCACAAGAGAACUCA   |
| siS3     | 466-488   | S 5': GUUCCGUGUCA AUGCAAA UU    |
|          |           | mRNA: AG GTTTCCGTGTCAATGCAAA CA |
|          |           | AS 3': UU CAAAGGCACAGUUACGUUU   |
| siS5     | 1240-1262 | S 5': CUGUUGCCAAUCCUGAUGA UU    |
|          |           | mRNA: CC CTGTTGCCAATCTGATGA CG  |
|          |           | AS 3': UU GACAACGGUUAGGACUACU   |

|       |             |                                                                                                  |
|-------|-------------|--------------------------------------------------------------------------------------------------|
| siS6  | 1388-1410   | S 5': CAUGGACAUUGUAGCCUCU UU<br>mRNA: GA CATGGACATTGTAGCCTCT GA<br>AS 3': UU GUACCUGUAACAUCGGAGA |
| siM1  | 1134-1156   | S 5': GGGCUUCCUUCAAUAGAU UU<br>mRNA: AA GGGCTTCCTTTCAATAGAT TC<br>AS 3': UU CCCGAAGGAAAGUUAUCUA  |
| siM2  | 520-542     | S 5': CCCGUAAGGAGUCUAUUGU UU<br>mRNA: AT CCCGTAAGGAGTCTATTGT CA<br>AS 3': UU GGGCAUUCCUCAGAUACA  |
| siM5  | 4463-4485   | S 5': GCUCUGGUAUCUCCUGUAA UU<br>mRNA: TA GCTCTGGTATCTCCTGTAA AG<br>AS 3': UU CGAGACCAUAGAGGACAUU |
| siM6  | 3173-3195   | S 5': GUCCAUACGAAGCUCUUGU UU<br>mRNA: TT GTCCATACGAAGTCTTTGT GC<br>AS 3': UU CAGGUAUGCUUCGAGAACA |
| siM17 | 19-41       | S 5': CACGUCAGUACGUAAGUGU UU<br>mRNA: GG CACGTCAGTACGTAAGTGT CA<br>AS 3': UU GUGCAGUCAUGCAUUCACA |
| siL1  | 5264-5286   | S 5': CAGGCCUUGAAGUCUUUAA UU<br>mRNA: GT CAGGCCTTGAAGTCTTTAA TG<br>AS 3': UU GUCCGGAACUUCAGAAAUU |
| siL3  | 8442-8464   | S 5': GCCUCUUGAUAGGCACAAU UU<br>mRNA: GG GCCTCTTGATAGGCACAAT GT<br>AS 3': UU CGGAGAACUAUCCGUGUUA |
| siL4  | 10080-10102 | S 5': GCCCUAUUUAGGGACAACU UU<br>mRNA: AA GCCCTATTTAGGGACAAC T G<br>AS 3': UU CGGGAUAAAUCCCUGUUGA |
| siL8  | 1126-1148   | S 5': GGCAUCAUGUUGUCAACAU UU<br>mRNA: TT GGCATCATGTTGTCAACAT TC<br>AS 3': UU CCGUAGUACAACAGUUGUA |
| siL33 | 116-138     | S 5': CUGGUCAGUAUGUGACCAA UU<br>mRNA: TG CTGGTCAGTATGTGACCAA CC<br>AS 3': UU GACCAGUCAUACACUGGUU |

129 For each experiment, transfection efficiency was monitored by transfecting A549 cells with 200  
130 nM of siTOX (Dharmacon™) under the same experimental conditions. Cells successfully transfected  
131 with siTOX went under apoptosis and cell death within 24-48 hours. After 3 days of incubation,  
132 siTOX transfected cells were trypsinized and manually counted using a hemacytometer (Trypan  
133 blue exclusion assay). Transfection efficiency was calculated as the ratio between the numbers of  
134 viable siTOX-transfected cells versus non-transfected cells. In our experiments, we experienced an  
135 average of 80% transfection efficiency.

#### 136 2.4. Cytotoxicity tests

137 In some cases, the designed siRNAs could interfere with the tested cells' genes (off-target effect)  
138 and cause cell death. During the concentration-dependent transfection, microscopic observation was  
139 performed. A549 cells were transfected with different concentrations (ranging from 0.1 nM to 300  
140 nM) of siRNAs. Cells were observed microscopically after the transfection at 24, 48 and 72 hours.  
141 During the trypan blue exclusion assay, cell deaths and cell morphological changes have been  
142 recorded if the siRNAs targeted S, M or L segments of CCHFV at high siRNA concentration.

143 Besides microscopic observation, cell cytotoxicity was examined with a luminescence cell  
144 viability assay kit (Promega – Cell Titer Glo Luminescent assay). This method determines the number  
145 of viable cells in culture, based on quantitation of the ATP present. Cells were transfected with  
146 different concentrations of siRNAs (ranging from 0.1 nM to 200 nM). After 72 hours of transfection,  
147 luminescence measurement was performed. The IC50 was calculated using GraphPadPrism version  
148 8.00 software (Graph Pad Software, San Diego California, USA) for non-linear regression.

149 The use of cytotoxicity tests was important to find out the concentration at which siRNAs do not  
150 cause cell death but their concentration is high enough to inhibit virus replication.

#### 151 2.5. Transfection and infection assay

152 Transfection and infection experiments were performed on A549 cells in the BSL-4 laboratory.  
153 A549 cells were seeded in 96-well plates at a density of  $2 \times 10^4$  cells/well to achieve 60-70% confluent  
154 cell monolayers on the day after in a humidified incubator at 37°C with 5% CO<sub>2</sub>.

155 Cells were transfected in triplicate biological replicates with siRNAs in the following final  
156 concentrations: 10 nM, 50 nM, 200 nM. Various siRNA concentrations were complexed with the  
157 transfection reagent Lipofectamine RNAiMax transfection reagent (Thermo Fisher Scientific)  
158 according to the manufacturer's instructions. The transfection reagent and siRNAs were diluted in  
159 Opti-MEM medium (Gibco). The final volume of Lipofectamine RNAiMax was 1.5 µl/well. The  
160 transfection mixture was incubated for 20 minutes at RT to allow the formation of siRNA-lipid  
161 complexes and 100 µl of the solution were added slowly dropwise to each well. Mock transfected,  
162 non-transfected A549 cells were used as controls for the experiments. Mock-transfected cells go  
163 through the transfection process without the addition of siRNA while non-transfected cells have not  
164 been treated at all. 16 hours post-transfection, cells were gently washed twice with DMEM. Thereafter  
165 transfected cells were infected with CCHFV at a MOI of 0.1. The inoculum was incubated for 1 hour  
166 to allow the absorbing of the virus on transfected cells. Cells were then cultivated in DMEM  
167 supplemented with 2% FBS, 1% Penicillin-Streptomycin for 48 hours. Non-transfected A549 cells  
168 which were infected with CCHFV at a MOI of 0.1 were used as positive cell controls. Cell  
169 morphology was monitored and 200 µl cell supernatant was harvested before nucleic acid extraction.

170 Virus replication decrease was assessed by determining the number of genome copies in 200 µl  
171 cell supernatant by qRT-PCR and RT-ddPCR.

#### 172 2.6. Viral RNA extraction and qRT-PCR for pre-screening

173 To investigate the inhibitory effect of all designed siRNAs in different concentrations (ranging  
174 from 10 nM to 200 nM), firstly qRT-PCR assay was performed as a pre-screen.

175 Template viral RNA from transfected cells and control cells were extracted from 200 µl culture  
176 supernatant using DNA/RNA extraction kit (Geneaid), according to the manufacturer's protocol. The



177 nucleic acid extraction was performed in the BSL-4 suite laboratory. The RNA elution was done in a  
178 volume of 50 µl of elution buffer and was stored at -80°C until further use.

179 The quantitative real-time TaqMan based assay was carried out using a One-step RT-PCR kit  
180 (Qiagen) in the Light Cycler 2.0 system (Roche). CCHFV specific primers and probe were based on  
181 Atkinson et al. publication (Table 2)[23]. Reaction profile was as follows: reverse transcriptions at  
182 50°C for 30 minutes, initial denaturation at 95°C 15 minutes, followed by 50 cycles of amplification at  
183 94°C 15 seconds, 51°C 30 seconds and 72°C 20 seconds.

184 **Table 2:** Primers and probe information for the CCHF real-time RT-PCR assay based on  
185 Atkinson et al. publication

| Primer/probe | Sequence (5'-3')                        | Nucleotide position |
|--------------|-----------------------------------------|---------------------|
| CCHF S1      | TCTCAAAGAAACACGTGCC                     | 1-19                |
| CCHF S122    | CCTTTTTGAACTCTTCAAACC                   | 102-122             |
| CCHF probe   | (FAM) ACTCAAGGKAACACTGTGGGCGTAAG (BHQ1) | 21-46               |

## 186 2.7. Droplet digital RT-PCR and data analysis

187 After RT-PCR prescreening, the siRNAs which inhibited CCHFV replication effectively were  
188 measured by RT-ddPCR in three time biological repetitions with different concentrations (ranging  
189 from 10 nM to 200 nM).

190 QX200 Droplet Digital PCR system (Bio-Rad, CA, USA) was used to determine CCHFV copy  
191 number decrease triggered by siRNAs from supernatants. One-Step RT-ddPCR advanced kit for  
192 probes (Bio-Rad, CA, USA) was used in our experiments. The RT-ddPCR reaction mixture consisted  
193 of 5 µl of a ddPCR Supermix, 2 µl reverse transcriptase, 1 µl 300 mM DTT, 900 nM CCHFV specific  
194 primers and 250 nM probe, 1 µl of sample nucleic acid solution and nuclease-free H<sub>2</sub>O in a final  
195 volume of 22 µl. The final concentrations of CCHFV specific primers and probe [23] were the same  
196 as for RT-qPCR assays. The entire reaction mixture was loaded into a disposable plastic cartridge  
197 (Bio-Rad, CA, USA) together with 70 µl of droplet generation oil for probes (Bio-Rad, CA, USA) and  
198 placed in the QX200 Droplet Generator (Bio-Rad, CA, USA). After processing, the droplets generated  
199 from each sample were transferred to a 96-well PCR plate (Bio-Rad CA, USA) and heat-sealed with  
200 PX1™ PCR Plate Sealer (Bio-Rad, CA, USA). PCR amplification was carried out on a C1000 Touch™  
201 Thermal Cycler with 96-Deep Well Reaction Module (Bio-Rad, CA, USA) using a thermal profile of  
202 beginning at reverse transcription: 50°C for 1 hour and 95°C for 10 min, followed by 40 cycles of 95°C  
203 for 30 s and 55°C for 60 s, 1 cycle of 98°C for 10 min, and ending at 4°C. After amplification, the plate  
204 was loaded on the QX200 Droplet Reader (Bio-Rad, CA, USA) and the droplets from each well of the  
205 plate were read automatically. Positive droplets, containing amplification products, were partitioned  
206 from negative droplets by applying a fluorescence amplitude threshold in QuantaSoft™ analysis  
207 software (Bio-Rad, CA, USA). The threshold line was set manually at 3780 amplitudes for every  
208 sample. Quantification of the target molecule was presented as the number of copies per µl of the  
209 PCR mix. All siRNAs in different concentrations were tested in three biological replicates. During the  
210 PCR reactions (qPCR and ddPCR) the same target segment was used.

## 211 2.8. Statistical analysis

212 All experiments were repeated in three biological replicates. In our study, we compared the  
213 antiviral effect of selected effective siRNAs in different concentrations to the positive control to detect  
214 significant variations using the Student's t-test. The measured dataset was statistically analyzed in  
215 the R environment [24]. The bar plots were created with ggplot2 R package [25]. During PCR reactions

216 (qPCR and ddPCR), three biological replicates of siRNA inhibited CCHFV samples were used and  
217 we did not use technical replicates in case of these siRNAs inhibited CCHFV samples since the three  
218 biological replicates include the technical replicate. However, the controls were used in three  
219 biological and three technical repeats.

### 220 3. Results

221 In our study, 15 siRNAs were designed and synthesized to test the inhibitory activity on CCHFV  
222 replication and target the mRNAs produced by S, M and L segments. We analyzed the high inhibitory  
223 effect of some S (siS2), M (siM1) and L (siL3, siL4) segment-specific siRNAs. We experienced that  
224 siRNAs inhibited CCHFV replication in different efficiency and dose-dependent manner.

#### 225 3.1. Cytotoxicity tests

226 During the experiments, two different types of cell viability tests were used: light microscopic  
227 observation and luminescence cytotoxicity measurement (Table 3).

228 The siRNAs treatment could cause visual cytopathogenic effects (CPEs) and affect viral growth,  
229 therefore we performed light microscopic observation to evaluate cell growth and viability. Firstly,  
230 we had to find the appropriate siRNA concentration that is effective in inhibiting CCHFV replication  
231 but not toxic to the cells. In our cytotoxicity experiments, after three days of siRNAs transfection, the  
232 cell number per well was observed and compared to non-transfected cells by manual counting with  
233 hemacytometer. In these experiments, we did not detect the cytotoxic effect of siRNAs on A549  
234 cells at any lower concentrations used. However, a high concentration of siRNAs (300 nM) caused  
235 cell morphology changes and cell death.

236 Besides morphological observation with light microscopy, luminescence cytotoxicity  
237 measurements (Promega – Cell Titer Glo Luminescent assay) were used. The half-maximal inhibitory  
238 concentration (IC<sub>50</sub>) is used to measure the potency of a material inhibiting a specific biological  
239 function. IC<sub>50</sub> is a quantitative measurement that indicates how much of a particular inhibitory  
240 substance (e.g. siRNA) is needed to inhibit given biological process by 50% *in vitro*. The IC<sub>50</sub> was  
241 calculated using GraphPadPrism version 8.00 software (Graph Pad Software, San Diego California,  
242 USA) for non-linear regression. In most cases, during cell viability tests, results that were observed  
243 microscopically were the same as the luminescence cytotoxicity measurements. Cell control and  
244 transfection reagent control showed the luminescence cytotoxicity measurements indicating no cell  
245 cytotoxicity of transfection reagent. In the case of siRNAs against the CCHFV S segment, the results  
246 were the same with the cell viability tests: IC<sub>50</sub> was observed around 200 nM in every siRNAs against  
247 the S segment. The most efficient S segment siRNA (siS2) IC<sub>50</sub> value was 246.7 nM which was  
248 calculating by GraphPadPrism version 8.00 software. CCHFV M segment siRNAs were proven to be  
249 non-toxic for the A549 cells up to 250 nM concentration. The most efficient M segment siRNA (siM1)  
250 IC<sub>50</sub> value was 251.8 nM. However, siRNAs against the M segment were used in 200 nM  
251 concentration because of the comparability. In the case of siRNAs against the CCHFV L segment  
252 results were the same with the cell viability tests, therefore we used them at maximum 200 nM  
253 concentration in our further experiments. The most efficient L segment siRNAs (siL3, siL4) IC<sub>50</sub>  
254 values were 180.92 and 180.8 nM, respectively.

255 Summarizing the cell viability results, the minimum concentration of siRNAs was set to 10 nM  
256 and the maximum concentration to 200 nM (10 nM, 50 nM, 100 nM, and 200 nM) in case of every  
257 segment. The little differences found between the cytotoxicity tests indicate that the use of  
258 microscopic observation alone is not sufficient enough to detect cell viability and specify the  
259 appropriate concentration of siRNAs.

#### 260 3.2. Inhibition of CCHFV replication using segment-specific siRNAs

261 qRT-PCR TaqMan assay was performed as pre-screening because of the large sample size, cost  
262 and time effectiveness. The siRNAs which showed promising inhibitory effect against CCHFV based

263 on qRT-PCR results were chosen for further experimentation. Out of the 15 siRNAs that were  
 264 designed against CCHFV, 9 were selected. In our further RNA interference experiments, three  
 265 siRNAs for every segment of CCHFV (siS1, siS2, siS6, siM1, siM6, siM17, siL1, siL3, and siL4) were  
 266 used (Figure 1/A).

267 Based on the ddPCR results, a high and significant copy number decrease in the case of some  
 268 siRNAs (siS2, siM1, siL3 and siL4) was detected. As shown in Figure 1/B, when siS2 was used at 200  
 269 nM concentration, it has strongly and significantly inhibited CCHFV replication compared to the  
 270 positive control ( $P < 0.001$ ). Among siRNAs against CCHFV S segment, siS2 was the most efficient  
 271 inhibitory siRNA. Furthermore, siS6 has shown a moderate but significant inhibitory effect in  
 272 CCHFV replication ( $P < 0.01$ ). In contrast, significant antiviral inhibitory effect of siS1 at 10 nM  
 273 concentration was not detected. Between siRNAs which were designed for the M segment, siM1 had  
 274 strong and significant antiviral activity at 100 nM concentration ( $P < 0.001$ ). Moreover, siM6 has also  
 275 shown CCHFV inhibitory effect at medium level ( $P < 0.001$ ). In contrast, siM17 has not inhibited  
 276 CCHFV replication significantly at 200 nM concentration. In case of the L segment, when siL4 was  
 277 used at 200 nM concentration, it has strongly inhibited CCHFV replication compared to the positive  
 278 control ( $P < 0.001$ ). SiL3 has also shown significant, high activities on CCHFV replication, while siL1  
 279 has shown moderate efficiency. ( $P < 0.001$ ) (Figure 1/B).  
 280

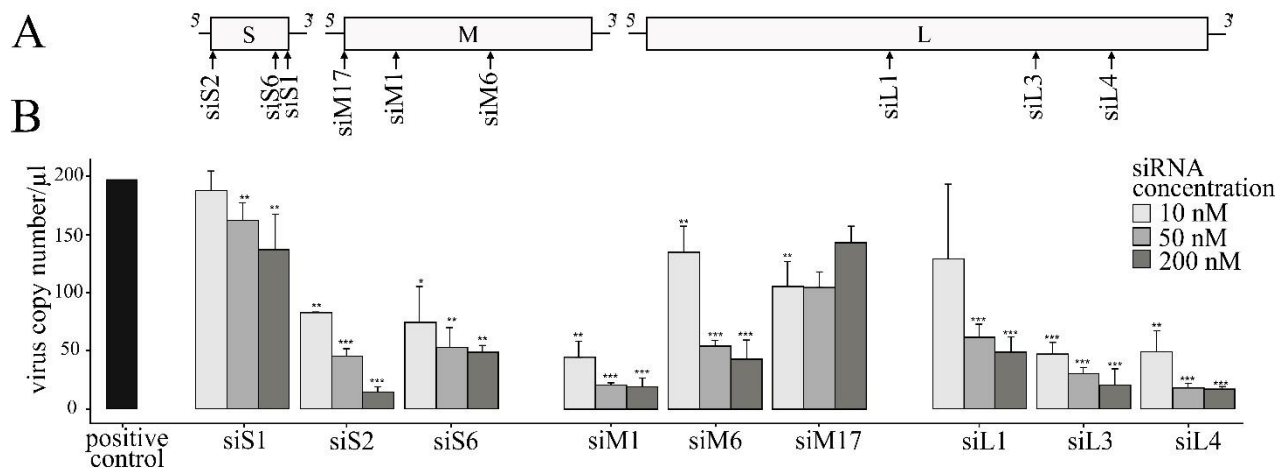

281 **Figure 1.** A549 cells were transfected with siRNAs which were designed for CCHFV S, M  
 282 and L segments in different concentrations (10 nM, 50 nM, and 200 nM). After transfection,  
 283 cells were infected with CCHFV at a MOI of 0.1. Three biological replicates of siRNA  
 284 inhibited CCHFV samples were used and the positive control was used in three biological  
 285 and three technical repeats. The virus copy number was determined after 72 hours by RT-  
 286 ddPCR. (a) CCHFV schematic gene map is containing designed CCHFV-specific siRNAs  
 287 site; (b) Inhibitory effect of siRNAs against CCHFV: the horizontal axis represents the virus  
 288 copy number/ $\mu$ l and the vertical axis represents the positive control and designed siRNAs.  
 289 Student's t-tests were significant if \*:  $P < 0.05$ , \*\*:  $P < 0.01$ , \*\*\*:  $P < 0.001$ . Error bars represent  
 290 the standard deviation (SD) of the means for three independent experiments.

291 At least one highly inhibitory siRNA was found in case of every segment. The siRNAs that were  
 292 designed for the S segment: the siS2 has shown the most efficient which decreased the virus copy  
 293 number by about 93% at 200 nM concentration. In case of M segments siRNAs, siM1 has decreased  
 294 the virus copy number by about 90% at 200 nM concentration which was almost the same as siS2.  
 295 Among siRNAs that were designed to L segment, siL4 has affected CCHFV replication (decrease by  
 296 about 92%) at 200 nM concentration just like siS2 and siM1. Inhibitory effect against CCHFV was not  
 297 caused by siS1 and siM17.

298 QuantaSofts' RT-ddPCR raw fluorescence readouts have shown negative and positive controls  
 299 in Figure 2. A negative droplet population was shown by the negative control sample without any



300 positive droplets. The positive control sample has appeared as a massive positive droplet population  
301 above the threshold level. In case of the positive control sample, the positive droplet “rain” was  
302 caused by the high concentration of CCHFV and appeared as a background signal. Concentration-  
303 dependent high inhibitory effect was shown by siS2 and siM1. At 10 nM concentration, positive  
304 droplet number was high in case of siS2, however, at 200 nM concentration, positive droplet number  
305 was decreased extensively. SiM1 acted similarly as siS2. A medium inhibitory effect against CCHFV  
306 replication was presented by SiM6. The positive droplet number decreased moderately from 10 nM  
307 to 200 nM compared to siS2 and siM1 events. In case of siM17, the significant inhibitory effect was  
308 not detected.

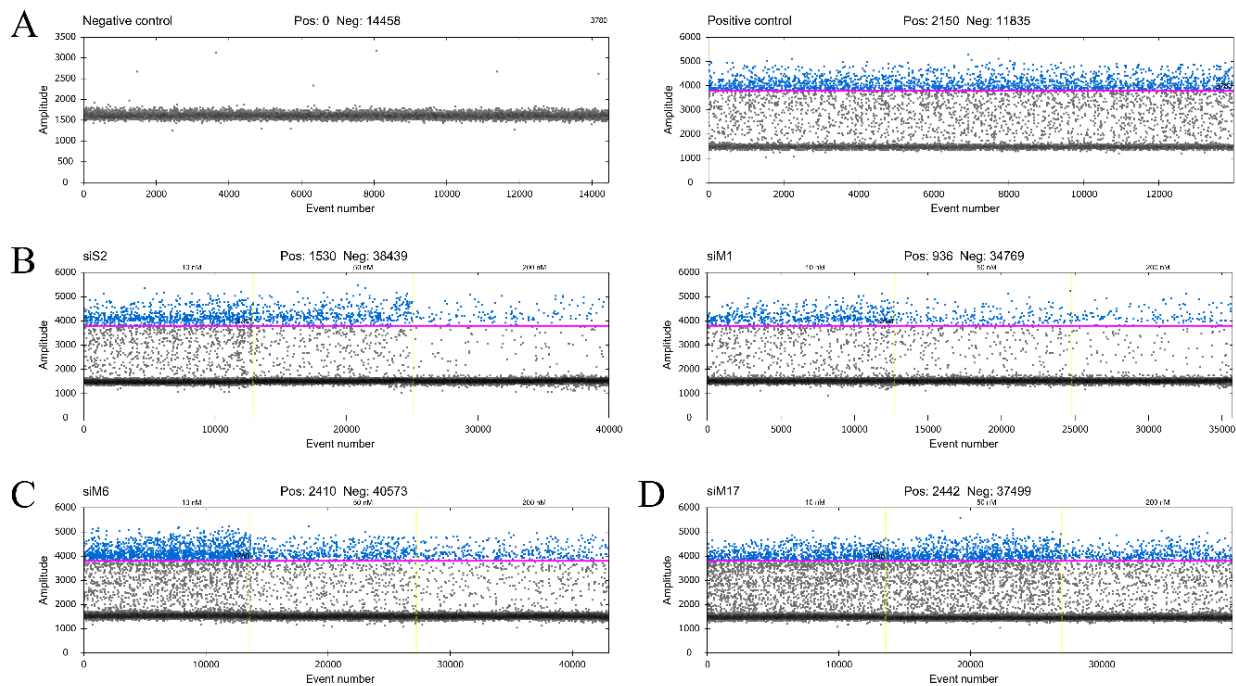

309 **Figure 2.** QuantaSofts' RT-ddPCR fluorescent readouts. The horizontal axis represents the  
310 event number and the vertical axis represents the fluorescence amplitude in the FAM channel.  
311 The strict threshold line (pink line) was set for every sample at 3780 amplitude. Positive  
312 droplets were represented in blue and negative droplets were represented in grey. (A)  
313 Negative control sample was shown as the negative droplet population without positive  
314 droplets, positive control sample was shown as the extensive positive droplet population; (B)  
315 siS2 and siM1 respectively were shown a concentration-dependent high inhibitory effect,  
316 different concentrations (10 nM, 50 nM, 200 nM) were separated with yellow, dotted line; (C)  
317 siM6 has shown concentration-dependent medium inhibitory effect at different  
318 concentrations (10 nM, 50 nM, 200 nM) that were separated with yellow, dotted line; (D) siM17  
319 has shown low inhibitory effect against CCHFV at different concentrations (10 nM, 50 nM, 200  
320 nM) that were separated with yellow, dotted line.

#### 321 4. Discussion

322 Therapeutic options for the treatment of CCHFV infection are lacking, with the noticeable  
323 exception of ribavirin, which is currently recommended by the WHO. Nevertheless, novel and more  
324 sophisticated antiviral therapies against nairovirus infections are urgently needed. In the last few  
325 years, several studies have shown that siRNAs have the potential to be operated as a specific  
326 therapeutic strategy against some viral infections [11,14,26,27]. However, most of these experiments  
327 are in the *in vitro* studies and translating RNAi in clinic, as a conventional treatment option remains

328 a pivotal challenge. In case of *in vivo* therapies, one of the most difficult parts is efficiently and  
329 specifically delivering siRNA to target tissues and cells. Moreover, the poor cellular uptake of siRNAs  
330 in combination with rapid enzymatic degradation are limiting RNAi usage *in vivo* therapies. Besides,  
331 different classes of siRNA chemical modifications can increase the efficiency of delivery.  
332 Fortunately, despite difficulties in virus entry, cytotoxicity and the stimulation of unspecific immune  
333 response researches evolved and reached *in vivo* experiments [18].

334 We baselined our control strategy exclusively to the results of cytotoxicity tests without using  
335 non-targeted siRNA as seen in other related papers as well [28]. We evaluated the antiviral activity  
336 of siRNAs targeting the S (nucleoprotein), M (glycoproteins) and L (polymerase) transcripts of  
337 CCHFV for the first time *in vitro*. The siRNAs were designed for each CCHFV segment in an effort to  
338 find the most effective ones. We observed that among all tested siRNAs, almost half of them (siS2,  
339 siS6, siM1, siM6, siL1, siL3, siL4) were capable of reducing CCHFV copy number by more than about  
340 70% during *in vitro* infection studies, comparing to the positive control. However, strong inhibition  
341 of CCHFV replication (by about 90%) was performed by only four siRNAs (siS2, siM1, siL3, and siL4).  
342 The unusual ability of many siRNAs inhibits the virus, contrary to previous studies, is due to the  
343 successful design and the high rate of transfection achieved.

344 In case of the CCHFV S segment protein, nucleoproteins play a central role in the regulation of  
345 viral replication. Nucleoprotein associated with genomic viral RNA to form RNPs and provided as a  
346 template for the polymerase. In the last few years, several homologous interferences have been  
347 described as the inhibition of S segment of other nairoviruses by siRNAs and suppression of viral  
348 replication [15,26,27]. Levin et al. found that Akabane virus (AKAV) infected Vero cells indicated  
349 more than 99% inhibition [26], whilst, Chiang et al. described siRNA against the S segment of andes  
350 virus (ANDV) greatly reduced levels (>60%) of viral protein expression [15]. In case of the haza  
351 virus inhibition, the siRNAs which were designed against the S segment had a higher effect (up to  
352 90%) than those targeting M and L segments [27]. Several experiments performed has shown that the  
353 S segment of genus *Orthobunyavirus* is the RNA interference prime target in arthropod cells [29,30].  
354 In our study, among siRNAs that were designed against the S segment, siS2 has inhibited effectively  
355 (93%) CCHFV copy number. Our study is in agreement with previous works [15,27] that targeting  
356 the S segment by siRNAs can produce an effective inhibitory impact. In consequence, using the S  
357 segment as the target for silencing virus replication has proven to be an option for future therapeutics.  
358 Hereafter, using siRNAs together can have superior effect against virus infections [26]. Our plans  
359 include the combined use of designed siRNAs against CCHFV infection.

360 CCHFV glycoproteins (Gn, Gc) are involved in cell entry, initial binding and fusion. However,  
361 the details of specific glycoprotein involvement remain unknown [2]. In contrast with other studies,  
362 a high inhibitory effect of siRNA (90%) was found against the M segment. Furthermore, Chiang et al.  
363 described that viral glycoproteins are limiting factors for virus production and viral glycoproteins  
364 are detected mainly in the lysosome rather than on the cell surface in genus *Orthonairovirus*  
365 endothelial cells. In that study, reducing the glycoprotein levels with siRNA against the M segment  
366 had a greater impact on virus copy number (decrease by about 90%) and release [15]. Moreover, the  
367 M segment is the most diverse genome of CCHFV. This diversity may come from how CCHFV uses  
368 the vectors and vertebrate hosts in different geographic ranges. Therefore, it is difficult to design  
369 general well-functioning inhibitory siRNAs for this segment and many studies found a lower  
370 inhibitory effect. Although glycoproteins encoded by the M gene are the most variable portion of the  
371 CCHF viruses, some functional domains of the glycoproteins are well conserved [2,31].

372 In case of CCHFV, the largest of the three segments termed the L segment, encodes an RNA-  
373 dependent RNA polymerase (RdRp) that is characterized by several conserved functional regions [2].  
374 Moreover, next to nucleoprotein, L protein drives the processes of transcription and replication that  
375 occur in the cytoplasm during the viral replication cycle. Thus, targeting this segment is likely to be  
376 an exact strategy. In our study, a remarkable copy number decrease (by 92%) was caused by siL4.

377 Taken together, our results provide further support for the use of RNA interference-based  
378 technique in the development of antiviral drugs against CCHFV infections. Moreover, to our  
379 knowledge, this is the first study that used designed siRNAs against CCHFV replication *in vitro* and  
380 the first study to provide RNAi solution to all three genomic segments of a nairovirus. Currently,

381 CCHFV constitutes a notable public health concern in our region, with significant geographic  
382 expansion in recent decades and growing epidemic potential [21,32,33]. One major limitation of our  
383 study is the lack of combinative experiments, however, it well projects future research directions.  
384 Combining efficient siRNAs with each other may reveal their potential synergic inhibition effect.  
385 Accordingly, the threat of viral infection will increase in the coming years, so any kind of research  
386 project aimed at preventing and overcoming a possible infection may be useful. Moreover, we would  
387 like to design time-dependent experiments that examine siRNAs efficiency before and after CCHFV  
388 infection because they are required for *in vivo* experiments in the future. This study gives novel and  
389 important research results for one of WHO's prioritized emerging disease and constitutes a major step  
390 for future antiviral development efforts.

391  
392 **Author Contributions:** BSL-4 laboratory processes were made by F.F., M.M., P.H., G.K., B.Z.; preparation of  
393 A549 cells was made by M.M., H.P.; siRNA design was made by F.F.; transfection and infection experiments  
394 were made by F.F.; cytotoxicity test was made by H.P., F.F.; RT-qPCR experiments were made by F.F.; RT-ddPCR  
395 experiments and data analysis were made by L.G., G.K., F.F.; manuscript writing was made by F.F.; supervision:  
396 F.J., G.K.

397 **Funding:** This research was funded by the Hungarian Scientific Research Fund OTKA KH129599. The project  
398 was supported by the European Union, and co-financed by the European Social Fund: Comprehensive  
399 Development for Implementing Smart Specialization Strategies at the University of Pécs (EFOP-3.6.1.-16-2016-  
400 00004), and by the University of Pécs within the "Viral Pathogenesis" Talent Centre program. The research was  
401 financed by the Higher Education Institutional Excellence Program of the Ministry for Innovation and  
402 Technology in Hungary, within the framework of the "Innovation for a sustainable life and environment" and  
403 "Multidisciplinary approach to brain function and disease" thematic programs of the University of Pécs  
404 (TUDFO/47138/2019-ITM). GK was supported by the János Bolyai Research Scholarship of the Hungarian  
405 Academy of Sciences. This publication was supported by the European Virus Archive goes Global (EVAg)  
406 project that has received funding from the European Union's Horizon 2020 research and innovation program  
407 under grant agreement No 653316.

408 **Acknowledgments:** We would like to kindly thank the opportunity to use the QX200 Droplet Digital PCR  
409 system (Bio-Rad, CA, USA) and valuable help to the Department of Laboratory Medicine (K.G., L.G.), University  
410 of Pécs. We would like to thank Levente Bálint and Jon Eugene Marquette to correct the manuscript's English  
411 language.

412 **Conflicts of Interest:** The authors declare no conflict of interest.

## 413 References

- 414 1. Ergönül, Ö. Crimean-Congo haemorrhagic fever. *Lancet Infect. Dis.* **2006**, *6*, 203–214.
- 415 2. Zivcec, M.; Scholte, F.; Spiropoulou, C.; Spengler, J.; Bergeron, É. Molecular insights into Crimean-Congo  
416 hemorrhagic fever virus. *Viruses* **2016**, *8*, 106.
- 417 3. Estrada-Peña, A.; Palomar, A.M.; Santibáñez, P.; Sánchez, N.; Habela, M.A.; Portillo, A.; Romero, L.;  
418 Oteo, J.A. Crimean-Congo hemorrhagic fever virus in ticks, Southwestern Europe, 2010. *Emerg. Infect.*  
419 *Dis.* **2012**, *18*, 179–80.
- 420 4. Keshtkar-Jahromi, M.; Kuhn, J.H.; Christova, I.; Bradfute, S.B.; Jahrling, P.B.; Bavari, S. Crimean-Congo  
421 hemorrhagic fever: current and future prospects of vaccines and therapies. *Antiviral Res.* **2011**, *90*, 85–92.
- 422 5. Fire, A.; Xu, S.; Montgomery, M.K.; Kostas, S.A.; Driver, S.E.; Mello, C.C. Potent and specific genetic  
423 interference by double-stranded RNA in *Caenorhabditis elegans*. *Nature* **1998**, *391*, 806–811.
- 424 6. Dykxhoorn, D.M.; Lieberman, J. Silencing viral infection. *PLoS Med.* **2006**, *3*, e242.
- 425 7. Coburn, G.A.; Cullen, B.R. Potent and specific inhibition of human immunodeficiency virus type 1  
426 replication by RNA interference. *J. Virol.* **2002**, *76*, 9225–9231.
- 427 8. Jacque, J.M.; Triques, K.; Stevenson, M. Modulation of HIV-1 replication by RNA interference. *Nature*  
428 **2002**, *418*, 435–438.
- 429 9. He, M.-L. Inhibition of SARS-associated coronavirus infection and replication by RNA interference.

- 430 *JAMA J. Am. Med. Assoc.* **2003**, 290, 2665–2666.
- 431 10. Shlomai, A.; Shaul, Y. Inhibition of hepatitis B virus expression and replication by RNA interference.  
432 *Hepatology* **2003**, 37, 764–770.
- 433 11. Kronke, J.; Kittler, R.; Buchholz, F.; Windisch, M.P.; Pietschmann, T.; Bartenschlager, R.; Frese, M.  
434 Alternative approaches for efficient inhibition of Hepatitis C virus RNA replication by small interfering  
435 RNAs. *J. Virol.* **2004**, 78, 3436–3446.
- 436 12. Ge, Q.; McManus, M.T.; Nguyen, T.; Shen, C.H.; Sharp, P.A.; Eisen, H.N.; Chen, J. RNA interference of  
437 influenza virus production by directly targeting mRNA for degradation and indirectly inhibiting all  
438 viral RNA transcription. *Proc. Natl. Acad. Sci. U. S. A.* **2003**, 100, 2718–2723.
- 439 13. Flusin, O.; Vigne, S.; Peyrefitte, C.N.; Bouloy, M.; Crance, J.-M.; Iseni, F. Inhibition of Hazara  
440 nairovirus replication by small interfering RNAs and their combination with ribavirin. *Virol. J.* **2011**, 8, 249.
- 441 14. Maffioli, C.; Grandgirard, D.; Leib, S.L.; Engler, O. SiRNA inhibits replication of langat virus, a member  
442 of the tick-borne encephalitis virus complex in organotypic rat brain slices. *PLoS One* **2012**, 7.
- 443 15. Chiang, C.-F.; Albariñ, C.G.; Lo, M.K.; Spiropoulou, C.F. Small interfering RNA inhibition of andes virus  
444 replication. *PLoS One* **2014**, 9, 99764.
- 445 16. Karothia, D.; Dash, P.K.; Parida, M.; Bhagyawant, S.; Kumar, J.S. Inhibition of West Nile virus replication  
446 by bifunctional siRNA targeting the NS2A and NS5 conserved region. *Curr. Gene Ther.* **2018**, 18, 180–190.
- 447 17. Kim, V.N. Small RNAs: classification, biogenesis, and function. *Mol. Cells* **2005**, 19, 1–15.
- 448 18. Tompkins, S.M.; Lo, C.-Y.; Tumpey, T.M.; Epstein, S.L. Protection against lethal influenza virus  
449 challenge by RNA interference in vivo. *Proc. Natl. Acad. Sci. U. S. A.* **2004**, 101, 8682–6.
- 450 19. McCaffrey, A.P.; Nakai, H.; Pandey, K.; Huang, Z.; Salazar, F.H.; Xu, H.; Wieland, S.F.; Marion, P.L.;  
451 Kay, M.A. Inhibition of hepatitis B virus in mice by RNA interference. *Nat. Biotechnol.* **2003**, 21, 639–644.
- 452 20. Duh, D.; Nichol, S.T.; Khristova, M.L.; Saksida, A.; Hafner-Bratkovič, I.; Petrovec, M.; Dedushaj, I.;  
453 Ahmeti, S.; Avšič-Županc, T. The complete genome sequence of a Crimean-Congo hemorrhagic fever  
454 virus isolated from an endemic region in Kosovo. *Virol. J.* **2008**, 5, 7.
- 455 21. Földes, F.; Madai, M.; Németh, V.; Zana, B.; Papp, H.; Kemenesi, G.; Bock-Marquette, I.; Horváth, G.;  
456 Herczeg, R.; Jakab, F. Serologic survey of the Crimean-Congo haemorrhagic fever virus infection among  
457 wild rodents in Hungary. *Ticks Tick. Borne. Dis.* **2019**, 10.
- 458 22. Yuan, B.; Latek, R.; Hossbach, M.; Tuschl, T.; Lewitter, F. siRNA Selection Server: an automated siRNA  
459 oligonucleotide prediction server. *Nucleic Acids Res.* **2004**, 32, W130-4.
- 460 23. Atkinson, B.; Chamberlain, J.; Logue, C.H.; Cook, N.; Bruce, C.; Dowall, S.D.; Hewson, R. Development  
461 of a real-time RT-PCR assay for the detection of Crimean-Congo hemorrhagic fever virus. *Vector-Borne*  
462 *Zoonotic Dis.* **2012**, 12, 786–793.
- 463 24. R Core Team R: a language and environment for statistical computing 2019.
- 464 25. Wickham, H. Getting started with qplot BT-ggplot2: elegant graphics for data analysis. In *ggplot2*;  
465 Wickham, H., Ed.; Springer New York, 2009; pp. 9–26 ISBN 978-0-387-98141-3.
- 466 26. Levin, A.; Kutznetova, L.; Kahana, R.; Rubinstein-Guini, M.; Stram, Y. Highly effective inhibition of  
467 Akabane virus replication by siRNA genes. *Virus Res.* **2006**, 120, 121–127.
- 468 27. Flusin, O.; Vigne, S.; Peyrefitte, C.N.; Bouloy, M.; Crance, J.M.; Iseni, F. Inhibition of Hazara  
469 nairovirus replication by small interfering RNAs and their combination with ribavirin. *Virol. J.* **2011**, 8.
- 470 28. Das, A.T.; Brummelkamp, T.R.; Westerhout, E.M.; Vink, M.; Madiredjo, M.; Bernards, R.; Berkhout, B.  
471 Human Immunodeficiency Virus Type 1 Escapes from RNA Interference-Mediated Inhibition. *J. Virol.*  
472 **2004**, 78, 2601–2605.
- 473 29. Garcia, S.; Billecocq, A.; Crance, J.-M.; Munderloh, U.; Garin, D.; Bouloy, M. Nairovirus RNA sequences

- 474 expressed by a Semliki Forest virus replicon induce RNA interference in tick cells. *J. Virol.* **2005**, *79*, 8942–  
475 8947.
- 476 30. Billecocq, A.; Vazeille-Falcoz, M.; Rodhain, F.; Bouloy, M. Pathogen-specific resistance to Rift Valley  
477 fever virus infection is induced in mosquito cells by expression of the recombinant nucleoprotein but  
478 not NSs non-structural protein sequences. *J. Gen. Virol.* **2000**, *81*, 2161–2166.
- 479 31. Erickson, B.R.; Deyde, V.; Sanchez, A.J.; Vincent, M.J.; Nichol, S.T. N-linked glycosylation of Gn (but not  
480 Gc) is important for Crimean Congo hemorrhagic fever virus glycoprotein localization and transport.  
481 *Virology* **2007**, *361*, 348–355.
- 482 32. Hornok, S.; Horváth, G. First report of adult *Hyalomma marginatum rufipes* (vector of Crimean-Congo  
483 haemorrhagic fever virus) on cattle under a continental climate in Hungary. *Parasit. Vectors* **2012**, *5*, 170.
- 484 33. Németh, V.; Oldal, M.; Egyed, L.; Gyuranecz, M.; Erdélyi, K.; Kvell, K.; Kalvatcev, N.; Zeller, H.; Bányai,  
485 K.; Jakab, F. Serologic evidence of Crimean-Congo hemorrhagic fever virus infection in Hungary. *Vector-  
486 Borne Zoonotic Dis.* **2013**, *13*, 270–272.
